# Supplementary material for: Characterization of the cork oak transcriptome dynamics during acorn development
Source: PubMed Central journal article supplement (PMC4479327; doi:10.1186/s12870-015-0534-1), 2015-06-25
Supplement: 12870_2015_534_MOESM2_ESM.pdf [file 12870_2015_534_MOESM2_ESM.pdf]

|                           | <i>Q.<br/>suber</i> | <i>Q.<br/>robur</i> | <i>Q.<br/>petraea</i> | <i>Q.<br/>rubra</i> | <i>Q. alba</i>   | <i>F.<br/>sylvatica</i> | <i>C.<br/>mollissima</i> | <i>C.<br/>dentata</i> |
|---------------------------|---------------------|---------------------|-----------------------|---------------------|------------------|-------------------------|--------------------------|-----------------------|
| Total contigs             | 80357               | 81671               | 58230                 | 28041               | 22102            | 31309                   | 48335                    | 45288                 |
| Translated proteins       | 56517<br>(70.3%)    | 65030<br>(79.6%)    | 47567<br>(81.7%)      | 20186<br>(72.0%)    | 16200<br>(73.3%) | 27765<br>(88.7%)        | 31907<br>(66.0%)         | 31338<br>(69.2%)      |
| Unique Uniprot homologous | 24474<br>(30.5%)    | 17565<br>(21.5%)    | 14618<br>(25.1%)      | 13804<br>(49.2%)    | 11777<br>(53.3%) | 10264<br>(32.8%)        | 19723<br>(40.8%)         | 18814<br>(41.5%)      |
| Complete proteins         | 19146<br>(33.9%)    | 16112<br>(24.8%)    | 9481<br>(19.9%)       | 1864<br>(9.2%)      | 1401<br>(8.6%)   | 3830<br>(13.8%)         | 4947<br>(15.5%)          | 2392<br>(7.6%)        |
| C-terminus proteins       | 11410<br>(20.2%)    | 21881<br>(33.6%)    | 16121<br>(33.9%)      | 4477<br>(22.2%)     | 3843<br>(23.7%)  | 10544<br>(38.0%)        | 7252<br>(22.7%)          | 6668<br>(21.3%)       |
| N-terminus proteins       | 10108<br>(17.9%)    | 14922<br>(22.9%)    | 12361<br>(26.0%)      | 3570<br>(17.7%)     | 2650<br>(16.4%)  | 7299<br>(26.3%)         | 5314<br>(16.7%)          | 5970<br>(19.1%)       |
| Internal proteins         | 15509<br>(27.4%)    | 12091<br>(18.6%)    | 9584<br>(20.1%)       | 10218<br>(50.6%)    | 8258<br>(51.0%)  | 6086<br>(21.9%)         | 14200<br>(44.5%)         | 16252<br>(51.9%)      |
| Misassembled              | 344<br>(0.6%)       | 24<br>(0.04%)       | 20<br>(0.04%)         | 57<br>(0.3%)        | 48<br>(0.3%)     | 6<br>(0.02%)            | 194<br>(0.6%)            | 56<br>(0.2%)          |
