# Supplementary material for: Characterization of the cork oak transcriptome dynamics during acorn development
Source: PubMed Central journal article supplement (PMC4479327; doi:10.1186/s12870-015-0534-1), 2015-06-25

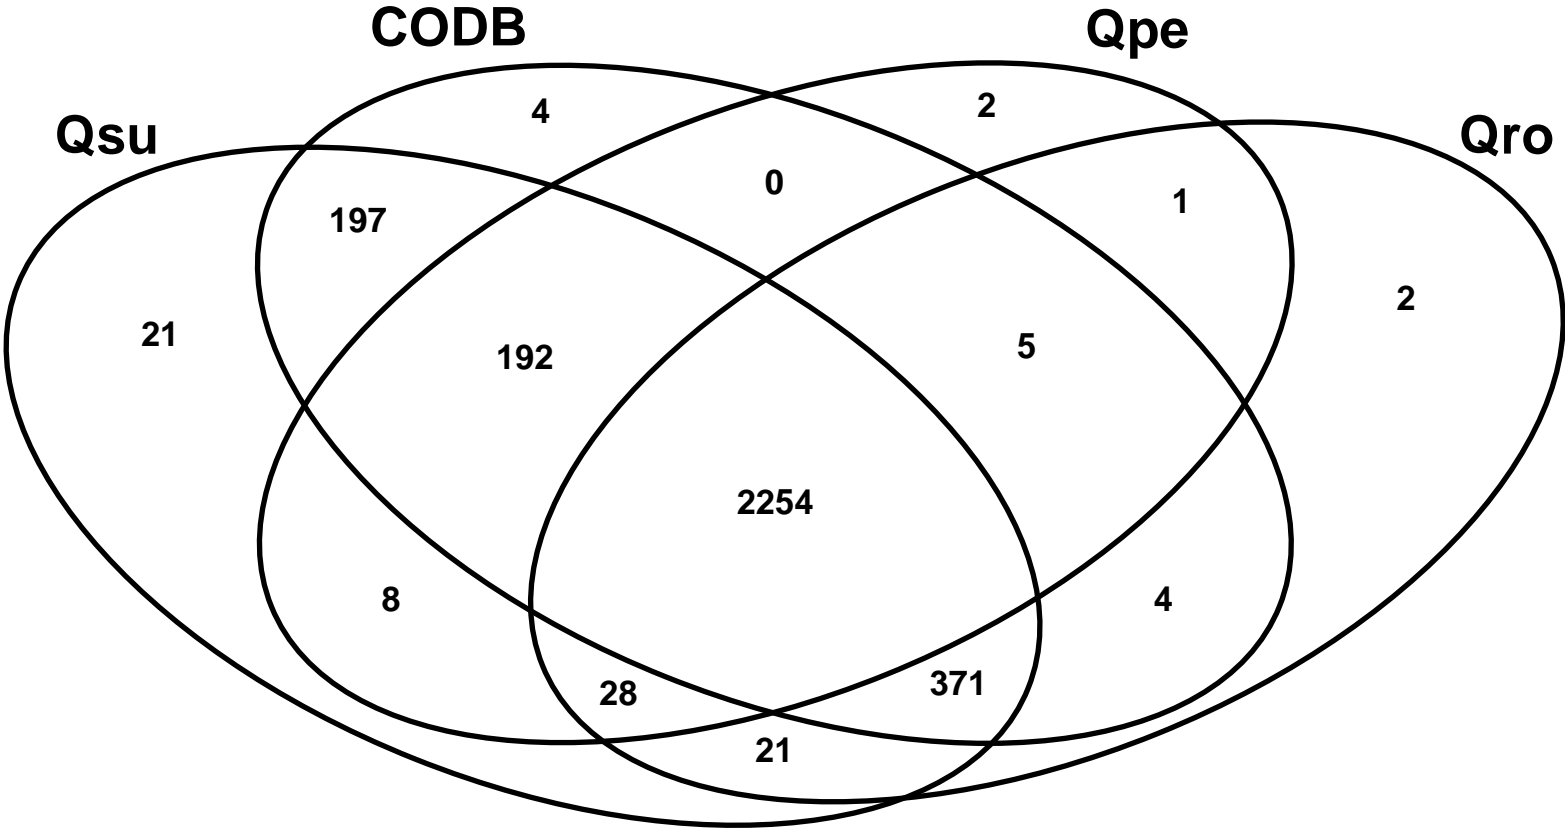

Supplement: 12870_2015_534_MOESM7_ESM.pdf [file 12870_2015_534_MOESM7_ESM.pdf]
