# Supplementary material for: Characterization of the cork oak transcriptome dynamics during acorn development
Source: PubMed Central journal article supplement (PMC4479327; doi:10.1186/s12870-015-0534-1), 2015-06-25
Supplement: 12870_2015_534_MOESM8_ESM.pdf [file 12870_2015_534_MOESM8_ESM.pdf]

| <b>Group</b>                                                          | <b>COGs</b> | <b>%</b> |
|-----------------------------------------------------------------------|-------------|----------|
| A - RNA processing and modification                                   | 14          | 6.31     |
| B - Chromatin structure and dynamics                                  | 4           | 1.80     |
| C - Energy production and conversion                                  | 4           | 1.80     |
| D - Cell cycle control, cell division, chromosome partitioning        | 12          | 5.41     |
| E - Amino acid transport and metabolism                               | 4           | 1.80     |
| F - Nucleotide transport and metabolism                               | 3           | 1.35     |
| G - Carbohydrate transport and metabolism                             | 2           | 0.90     |
| H - Coenzyme transport and metabolism                                 | 5           | 2.25     |
| I - Lipid transport and metabolism                                    | 11          | 4.95     |
| J - Translation, ribosomal structure and biogenesis                   | 14          | 6.31     |
| K - Transcription                                                     | 11          | 4.95     |
| L - Replication, recombination and repair                             | 27          | 12.16    |
| M - Cell wall/membrane/envelope biogenesis                            | 2           | 0.90     |
| O - Post-translational modification, protein turnover, and chaperones | 11          | 4.95     |
| P - Inorganic ion transport and metabolism                            | 2           | 0.90     |
| Q - Secondary metabolites biosynthesis, transport, and catabolism     | 1           | 0.45     |
| R - General function prediction only                                  | 29          | 13.06    |
| S - Function unknown                                                  | 46          | 20.72    |
| T - Signal transduction mechanisms                                    | 8           | 3.60     |
| U - Intracellular trafficking, secretion, and vesicular transport     | 6           | 2.70     |
| Y - Nuclear structure                                                 | 3           | 1.35     |
| Z - Cytoskeleton                                                      | 3           | 1.35     |
|                                                                       | 222         | 100.00   |
